# Supplementary material for: The Significance of FilmArray Blood Culture Identification Panel (FA-BCID) for Managing Patients with Positive Blood Cultures
Source: MDPI journal article supplement (doi:10.3390/diagnostics13213335), 2023-10-29
Supplement: s1 [file s1]

**Table S1.** Microorganisms identified by MALDI-TOF and FA-BCID.

| Sample no. | Gram Stain                          | FA BCID Result                                          |                    | MALDI-TOF Result                                              |                    | Concordance | Antibiotic resistance genes |
|------------|-------------------------------------|---------------------------------------------------------|--------------------|---------------------------------------------------------------|--------------------|-------------|-----------------------------|
|            |                                     | Identification                                          | Mono/polymicrobial | Identification                                                | Mono/polymicrobial |             |                             |
| 1          | G(+) cocci in chain                 | <i>Enterococcus</i><br><i>Pseudomonas aeruginosa</i>    | poly               | <i>Enterococcus faecalis</i><br><i>Pseudomonas aeruginosa</i> | poly               | Y           |                             |
| 2          | G(+) cocci in chain                 | <i>Streptococcus</i>                                    | mono               | <i>Streptococcus anginosus</i>                                | mono               | Y           |                             |
| 3          | G(+) cocci in chain<br>G(-) bacilli | <i>Enterococcus</i>                                     | mono               | <i>Enterococcus faecium</i><br><i>Shewanella algae</i>        | poly               | N           |                             |
| 4          | Yeast                               | <i>Candida tropicalis</i>                               | mono               | <i>Candida tropicalis</i>                                     | mono               | Y           |                             |
| 5          | G(+) cocci in chain                 | <i>Enterococcus</i>                                     | mono               | <i>Enterococcus faecalis</i>                                  | mono               | Y           |                             |
| 6          | G(-) rod                            | <i>Escherichia coli</i>                                 | mono               | <i>Escherichia coli</i>                                       | mono               | Y           |                             |
| 7          | G(+) cocci in chain                 | <i>Enterococcus</i>                                     | mono               | <i>Enterococcus faecium</i>                                   | mono               | Y           |                             |
| 8          | G(+) cocci in chain                 | <i>Streptococcus</i>                                    | mono               | <i>Streptococcus constellatus</i>                             | mono               | Y           |                             |
| 9          | Yeast                               | <i>Candida tropicalis</i>                               | mono               | <i>Candida tropicalis</i>                                     | mono               | Y           |                             |
| 10         | G(+) cocci in pairs<br>Yeast        | <i>Enterococcus</i><br><i>Candida tropicalis</i>        | poly               | <i>Enterococcus faecium</i><br><i>Candida tropicalis</i>      | poly               | Y           |                             |
| 11         | G(+) cocci in chain<br>G(-) rod     | <i>Streptococcus</i>                                    | mono               | <i>Streptococcus intermedius</i>                              | mono               | Y           |                             |
| 12         | G(-) rod                            | <i>Escherichia coli</i>                                 | mono               | <i>Escherichia coli</i>                                       | mono               | Y           |                             |
| 13         | G(-) rod                            | <i>Escherichia coli</i>                                 | mono               | <i>Escherichia coli</i>                                       | mono               | Y           |                             |
| 14         | G(-) rod                            | <i>Klebsiella pneumoniae</i>                            | mono               | <i>Klebsiella pneumoniae</i>                                  | mono               | Y           |                             |
| 15         | G(-) rod                            | <i>Klebsiella pneumoniae</i>                            | mono               | <i>Klebsiella pneumoniae</i>                                  | mono               | Y           |                             |
| 16         | G(-) rod                            | <i>Escherichia coli</i><br><i>Klebsiella pneumoniae</i> | poly               | <i>Escherichia coli</i><br><i>Klebsiella pneumoniae</i>       | poly               | Y           |                             |
| 17         | G(+) cocci in cluster               | <i>Staphylococcus aureus</i>                            | mono               | <i>Staphylococcus aureus</i>                                  | mono               | Y           |                             |
| 18         | G(-) rod                            | <i>Escherichia coli</i>                                 | mono               | <i>Escherichia coli</i>                                       | mono               | Y           |                             |
| 19         | G(-) rod                            | <i>Escherichia coli</i>                                 | mono               | <i>Escherichia coli</i>                                       | mono               | Y           |                             |
| 20         | G(-) rod                            | <i>Escherichia coli</i>                                 | mono               | <i>Escherichia coli</i>                                       | mono               | Y           |                             |
| 21         | G(-) rod                            | <i>Escherichia coli</i>                                 | mono               | <i>Escherichia coli</i>                                       | mono               | Y           |                             |
| 22         | G(-) rod                            | <i>Escherichia coli</i><br><i>Klebsiella oxytoca</i>    | poly               | <i>Escherichia coli</i><br><i>Klebsiella oxytoca</i>          | poly               | Y           |                             |
| 23         | G(-) rod                            | <i>Escherichia coli</i>                                 | mono               | <i>Escherichia coli</i>                                       | mono               | Y           |                             |
| 24         | G(-) rod                            | <i>Staphylococcus aureus</i><br>(mecA+)                 | mono               | <i>Staphylococcus aureus</i>                                  | mono               | Y           | mecA+                       |

|    |                                 |                                                                                                                           |      |                                                                   |      |   |       |
|----|---------------------------------|---------------------------------------------------------------------------------------------------------------------------|------|-------------------------------------------------------------------|------|---|-------|
| 25 | G(-) rod                        | <i>Escherichia coli</i>                                                                                                   | mono | <i>Escherichia coli</i>                                           | mono | Y |       |
| 26 | G(+) cocci in cluster           | <i>Staphylococcus aureus</i>                                                                                              | mono | <i>Staphylococcus aureus</i>                                      | mono | Y |       |
| 27 | G(-) rod                        | <i>Escherichia coli</i>                                                                                                   | mono | <i>Escherichia coli</i>                                           | mono | Y |       |
| 28 | G(+) cocci in cluster           | <i>Staphylococcus aureus</i> (mecA+)                                                                                      | mono | <i>Staphylococcus aureus</i>                                      | mono | Y | mecA+ |
| 29 | G(-) rod                        | <i>Escherichia coli</i> (KPC+)                                                                                            | mono | <i>Escherichia coli</i>                                           | mono | N | KPC+  |
| 30 | G(+) cocci in cluster           | <i>Staphylococcus aureus</i> (mecA+)                                                                                      | mono | <i>Staphylococcus aureus</i><br><i>Staphylococcus epidermidis</i> | poly | Y | mecA+ |
| 31 | G(-) rod                        | <i>Klebsiella pneumoniae</i>                                                                                              | mono | <i>Klebsiella pneumoniae</i>                                      | mono | Y |       |
| 32 | G(-) rod                        | <i>Klebsiella pneumoniae</i>                                                                                              | mono | <i>Klebsiella pneumoniae</i>                                      | mono | Y |       |
| 33 | G(+) cocci in chain<br>G(+) rod | None                                                                                                                      | -    | <i>Enterococcus faecalis</i><br><i>Clostridium tertium</i>        | poly | N |       |
| 34 | G(+) cocci in pairs             | <i>Staphylococcus aureus</i> (mecA+)<br><i>Proteus</i>                                                                    | poly | <i>Staphylococcus epidermidis</i>                                 | mono | N | mecA+ |
| 35 | G(+) cocci in cluster           | <i>Staphylococcus aureus</i>                                                                                              |      | <i>Staphylococcus aureus</i>                                      | mono | Y |       |
| 36 | G(-) rod                        | <i>Escherichia coli</i><br><i>Proteus</i>                                                                                 | poly | <i>Escherichia coli</i>                                           | mono | N |       |
| 37 | G(-) rod                        | <i>Enterococcus</i><br><i>Escherichia coli</i><br><i>Pseudomonas aeruginosa</i>                                           | poly | <i>Escherichia coli</i>                                           | mono | N |       |
| 38 | G(-) rod                        | <i>Escherichia coli</i><br><i>Proteus</i>                                                                                 | poly | <i>Escherichia coli</i>                                           | mono | N |       |
| 39 | G(+) cocci in pairs             | <i>Streptococcus pneumoniae</i><br><i>Proteus</i>                                                                         | poly | <i>Streptococcus pneumoniae</i>                                   | mono | N |       |
| 40 | G(-) rod                        | <i>Escherichia coli</i><br><i>Proteus</i>                                                                                 | poly | <i>Escherichia coli</i>                                           | mono | N |       |
| 41 | G(-) rod                        | <i>Klebsiella pneumoniae</i>                                                                                              | mono | <i>Klebsiella pneumoniae</i>                                      | mono | Y |       |
| 42 | G(-) rod                        | <i>Escherichia coli</i>                                                                                                   | mono | <i>Escherichia coli</i>                                           | mono | Y |       |
| 43 | G(-) rod                        | <i>Escherichia coli</i>                                                                                                   | mono | <i>Escherichia coli</i>                                           | mono | Y |       |
| 44 | G(-) rod                        | <i>Escherichia coli</i>                                                                                                   | mono | <i>Escherichia coli</i>                                           | mono | Y |       |
| 45 | G(-) rod                        | None                                                                                                                      | -    | <i>Bacteroides fragilis</i>                                       | mono | N |       |
| 46 | G(-) rod                        | <i>Klebsiella pneumoniae</i>                                                                                              | mono | <i>Klebsiella pneumoniae</i>                                      | mono | Y |       |
| 47 | G(-) rod                        | <i>Escherichia coli</i>                                                                                                   | mono | <i>Escherichia coli</i>                                           | mono | Y |       |
| 48 | G(+) cocci,<br>G(-) rod         | <i>Enterococcus</i><br><i>Staphylococcus aureus</i> (mecA+)<br><i>Streptococcus agalactiae</i><br><i>Escherichia coli</i> | poly | <i>Streptococcus agalactiae</i>                                   | mono | N | mecA+ |
| 49 | G(-) rod                        | <i>Escherichia coli</i>                                                                                                   | mono | <i>Escherichia coli</i>                                           | mono | Y |       |
| 50 | G(-) rod                        | <i>Klebsiella pneumoniae</i> (KPC+)                                                                                       | mono | <i>Klebsiella pneumoniae</i>                                      | mono | N | KPC+  |

|    |                               |                                                   |      |                                                            |      |   |       |
|----|-------------------------------|---------------------------------------------------|------|------------------------------------------------------------|------|---|-------|
| 51 | G(+) cocci in cluster         | <i>Staphylococcus aureus</i> (mecA+)              | mono | <i>Staphylococcus caprae</i>                               | mono | N | mecA+ |
| 52 | G(-) rod                      | <i>Escherichia coli</i><br><i>Proteus</i>         | poly | <i>Escherichia coli</i>                                    | mono | N |       |
| 53 | G(-) rod                      | <i>Proteus</i>                                    | mono | <i>Citrobacter youngae</i>                                 | mono | N |       |
| 54 | G(-) rod                      | <i>Escherichia coli</i>                           | mono | <i>Escherichia coli</i>                                    | mono | Y |       |
| 55 | G(-) rod                      | <i>Klebsiella oxytoca</i>                         | mono | <i>Klebsiella oxytoca</i>                                  | mono | Y |       |
| 56 | G(+) cocci in cluster         | <i>Staphylococcus</i> (mecA+)                     | mono | <i>Staphylococcus epidermidis</i>                          | mono | Y | mecA+ |
| 57 | G(+) cocci in chain           | <i>Streptococcus agalactiae</i><br><i>Proteus</i> | poly | <i>Streptococcus agalactiae</i>                            | mono | N |       |
| 58 | G(-) rod                      | <i>Escherichia coli</i>                           | mono | <i>Escherichia coli</i>                                    | mono | Y |       |
| 59 | G(+) cocci in pairs, G(-) rod | <i>Enterococcus</i><br><i>Enterobacteriaceae</i>  | poly | <i>Enterococcus faecium</i><br><i>Citrobacter freundii</i> | poly | Y |       |
| 60 | G(-) rod                      | <i>Escherichia coli</i>                           | mono | <i>Escherichia coli</i>                                    | mono | Y |       |

Abbreviation: FA-BCID; filmArray Blood culture identification, MALDI-TOF; matrix-assisted laser desorption/ionization time-of-flight; KPC, *Klebsiella pneumoniae* carbapenemas; mecA; methicillin resistance gene.
